# Supplementary material for: Lysosome-controlled efficient ROS overproduction against cancer cells with a high pH-responsive catalytic nanosystem
Source: Royal Society of Chemistry journal article supplement (doi:10.1039/c5nr00706b), 2015-01-01
Supplement: c5nr00706b1.pdf [file c5nr00706b1.pdf]

# Supporting Information

## Lysosome-Controlled Efficient ROS Overproduction against Cancer Cells with High pH-Responsive Catalytic Nanosystem

Jingke Fu, Yiran Shao, Liyao Wang and Yingchun Zhu\*

Key Lab of Inorganic Coating Materials, Shanghai Institute of Ceramics, Chinese Academy of Sciences, Shanghai 200050, China.

\* To whom correspondence should be addressed:

Tel.: 86-21-52412632; Fax: 86-21-52412632; E-mail: yzhu@mail.sic.ac.cn.

### Experimental section

#### Materials

Cetyltrimethyl ammonium bromide ( $C_{16}TAB$ ), tetraethyl orthosilicate (TEOS),  $Fe_3O_4$  NPs (*ca.* 20 nm) and 3,3',5,5'-tetramethylbenzidine (TMB) were obtained from Aladdin. Titanium potassium oxalate ( $K_2TiO(C_2O_4)_2 \cdot 2H_2O$ ), hydrogen peroxide ( $H_2O_2$ , 30%) and potassium ferricyanide were purchased from Sinopharm Chemical Reagent Co., Ltd. Potassium ferrate ( $K_2FeO_4$ ), 3-aminopropyltriethoxysilane (APTES), fluorescein isothiocyanate (FITC), dimethyl sulfoxide (DMSO), 3-(4,5-dimethylthiazol-2-yl)-2,5-diphenyltetrazolium bromide (MTT) and 2',7'-dichlorodihydrofluorescein diacetate (DCFH-DA) were from Sigma. Phosphate buffered saline (PBS, pH 7.4), RPMI-1640 medium, trypsin and fetal bovine serum (FBS) were obtained from Gibco. All chemicals were used as received without further purification. Milli-Q water was used in all experiments.

#### Synthesis of $FeO_x$ -MSNs

Firstly, mono-dispersed mesoporous silica nanoparticles (MSNs) were prepared according to the literature procedure.<sup>1</sup> The obtained  $C_{16}TAB$ -containing product was referred as MSNs-C. Afterwards,  $FeO_x$  species were *in situ* introduced into the mesopores of MSNs by using  $K_2FeO_4$  as the oxidant and iron precursor. Briefly, the MSNs-C (0.5 g) was suspended into PBS (pH~12, 50 mL) under ultrasonic treatment. Then  $K_2FeO_4$  (0.005, 0.01 or 0.02 mol  $L^{-1}$ ) was added into the suspension. After stirring for 12 h in the dark, the solid was collected by centrifugation, washed with water and ethanol, and free dried. Finally, the dry solid was calcined in air and in mixed  $H_2/Ar$  atmosphere to obtain  $FeO_x$ -MSNs-*n*, where *n* is the initial  $K_2FeO_4$  content (mol  $L^{-1}$ ) in the reaction solution.

#### Catalytic Decomposition of $H_2O_2$

Hydrogen peroxide ( $H_2O_2$ , 5 mM in PBS with pH 7.4 or 5.0) was mixed with  $FeO_x$ -MSNs or commercially available  $Fe_3O_4$  NPs (*ca.* 20 nm) in sealed flasks. The flasks were kept at ambient temperature and left incubated in a shaking table in the dark. At specific time-points, aliquots of the mixture were withdrawn and filtrated. The  $H_2O_2$  concentration was then measured by spectrophotometer. Briefly, the filtrated sample was diluted and mixed with titanium potassium oxalate solution (50  $\mu M$ , 0.5 mL) under acidic condition. The UV-Vis absorbance of the mixture

was recorded at 400 nm after 10 min. The H<sub>2</sub>O<sub>2</sub> concentration was determined according to the standard curves (H<sub>2</sub>O<sub>2</sub> concentration: 25-40 µg mL<sup>-1</sup>, λ<sub>max</sub> = 400 nm, r = 0.9997).

### ***Catalytic Oxidation of TMB***

FeO<sub>x</sub>-MSNs were added to the H<sub>2</sub>O<sub>2</sub> solution (530 mM in PBS with pH 7.4 or 5.0) in the presence of 3,3',5,5'-tetramethylbenzidine (TMB, 816 µM). The mixture was incubated at 37 °C for 30 min. The reaction was then stopped by adding H<sub>2</sub>SO<sub>4</sub> (0.5 M, 200 µL). H<sub>2</sub>O<sub>2</sub> solution (530 mM in PBS with pH 7.4 or 5.0) in the presence of TMB (816 µM) without samples was used as the control.

### ***TPA-Na for •OH Detection***

To explore the catalytic decomposition of H<sub>2</sub>O<sub>2</sub> by FeO<sub>x</sub>-MSNs, sodium terephthalate (TPA-Na), which is a well-known probe for •OH detection, was added to the H<sub>2</sub>O<sub>2</sub> solution (5 mM in PBS with pH 7.4 or 5.0) with or without FeO<sub>x</sub>-MSNs. After a given time-course, the sample was withdrawn, filtrated, and measured by fluorescence spectrometer (FluoroMax-4, HORIBA, USA).

### ***Cell Culture***

Human breast carcinoma ZR75-30 cells were purchased from cell bank of Chinese Academy of Sciences, and cultured in RPMI-1640 medium (pH 7.4) supplemented with 10% heat-inactivated fetal bovine serum (FBS) at 37 °C in a humid atmosphere with 5.0% CO<sub>2</sub>.

### ***Fluorescence Labeling of FeO<sub>x</sub>-MSNs with FITC***

FITC (10 mg) was mixed with APTES (400 µL) in ethanol under dark condition for 24 h to obtain FITC-APTES. Then, FeO<sub>x</sub>-MSNs (50 mg) were dispersed in absolute ethanol and sonicated for 30 min, followed by adding FITC-APTES (3 mL). After stirring for 24 h in the dark, the FITC-conjugated nanoparticles (FeO<sub>x</sub>-MSNs-FITC) were collected, washed with ethanol for several times, and freeze dried in the dark.

### ***Fluorescence Microscopy Observation of Intracellular Uptake of FeO<sub>x</sub>-MSNs***

ZR75-30 cells were plated in Petri dishes (Corning, NY) at 1.0 × 10<sup>4</sup> cells mL<sup>-1</sup> and cultured overnight at 37 °C. After incubation with FeO<sub>x</sub>-MSNs-FITC (50 µg mL<sup>-1</sup>) for 4 h, cells were washed with cold PBS (pH 7.4) followed by staining with DAPI (Cell Apoptosis DAPI Detection Kit, KeyGEM, 10% in methanol) for 15 min at 37 °C. Cells were washed twice with PBS and then examined with an inverted fluorescence microscope (Olympus IX71, Japan).

### ***Detection of Intracellular Fe<sup>2+</sup> by Turnbull's Blue Stain***

ZR75-30 cells were incubated with FeO<sub>x</sub>-MSNs for 12 h. After washing twice with PBS, cells were stained with 1% potassium ferricyanide and 1% HCl mixture for 4 h at 37 °C. Then cells were counterstained with safranin (0.5% w/v, in PBS) for 3 min. After final washes with PBS, cells were exposed to fluorescence microscopy observation. Cells are stained red and the Fe<sup>2+</sup>-positive cytosol is stained blue. Cells incubated with MSNs were used as the control.

### ***Cell Proliferation Assays by MTT Protocol***

MTT assay was performed to evaluate the *in vitro* cytotoxicity of FeO<sub>x</sub>-MSNs and/or H<sub>2</sub>O<sub>2</sub>. ZR75-30 cells were seeded in 96-well plates at 5.0 × 10<sup>4</sup> cells per mL and incubated at 37 °C for 24 h. Then the culture media were replaced with serum-free media containing various concentrations of FeO<sub>x</sub>-MSNs or H<sub>2</sub>O<sub>2</sub> for 4 h or 24 h. At the end of the incubation, the culture media were removed and cells were washed twice with cold PBS. Then, 20 µL of MTT

solutions (5 mg mL<sup>-1</sup> in PBS) were added to each well and co-incubated for another 4 h at 37 °C. Finally, the media were replaced with dimethyl sulfoxide (DMSO, 150 µL per well) and gently shook for 5 min. The absorbance at 570 nm was monitored by a microplate reader (Bio-Tek ELx800). The cytotoxicity was quantified as the percentage of cell viability compared to the negative control group. Each data point is represented as means ± SD of six independent experiments.

### ***Detection and Quantification of Intracellular ROS by Fluorescence Microscopy and Fluorescence Spectrometer***

A stock solution of DCFH-DA (1 mM in DMSO) was prepared and stored in -20 °C. ZR75-30 cells growing on petri dishes were exposed to serum-free media with FeO<sub>x</sub>-MSNs and/or H<sub>2</sub>O<sub>2</sub> for 6 h at 37 °C. Then the culture media were replaced with DCFH-DA (10 µM) for 30 min at 37 °C. After washing carefully with PBS twice, the fluorescence was observed by fluorescence microscopy (Olympus IX71, Japan). Besides, cells were collected by trypsin and analyzed by fluorescence spectrophotometer (HORIBA FluoroMax-4, France) with an excitation wavelength of 488 nm.

### ***Characterization***

The morphology of the samples was recorded by transmission electron microscopy (TEM) on a JEM-2100F electron microscope. The microstructures were measured on a Micrometitics Tristar 3000 N<sub>2</sub> adsorption-desorption analyzer. Barrette-Joynere-Halenda (BET) analysis was performed to determine the surface area and pore volume. Powder X-ray diffraction (XRD) pattern was recorded on a Rigaku Ultima IV diffractometer. UV-Visible absorbance spectra were tested on a UV-3101 Shimadzu spectroscope. Quantity of the Fe element was performed by inductively coupled plasma atomic emission spectrometry (ICP-AES, Varian, USA). UV-Visible diffuse reflection spectra (DRS) were recorded on a Hitachi U-4100 Spectrophotometer. X-ray photoelectron spectroscopy (XPS) was obtained on an Axis Ultra DLD spectrometer (Kratos, UK).

### ***Statistical Analysis***

Quantified data are presented as means ± SDs (n = 6). Significance of differences was analyzed by Student's *t*-test. *P* < 0.05 is considered as significant.

## Supplementary Figures

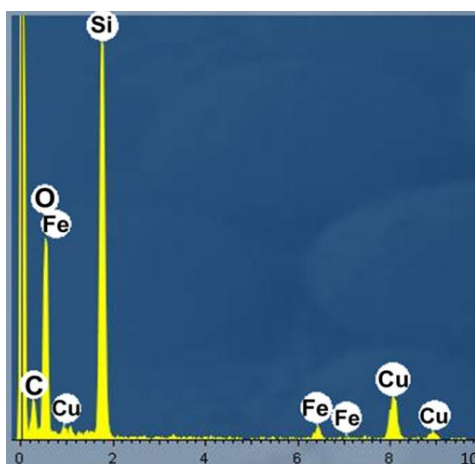

**Fig. S1** EDS element analysis of FeO<sub>x</sub>-MSNs-0.005.

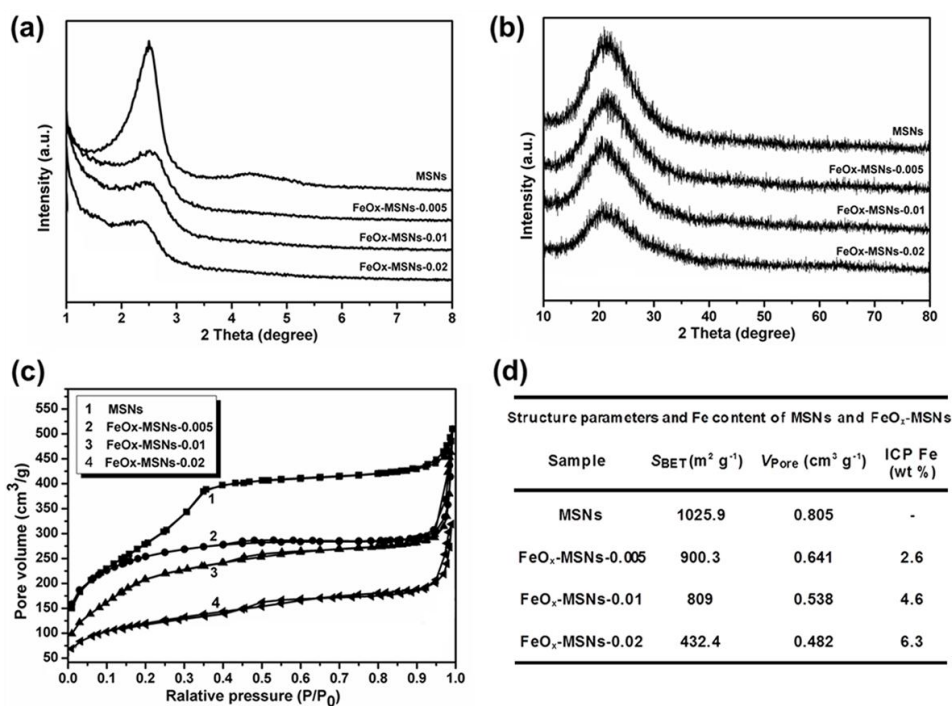

**Fig. S2** (a, b) Small-angle and wide-angle XRD patterns of MSNs and FeO<sub>x</sub>-MSNs-*n*. (c) N<sub>2</sub> adsorption-desorption isotherms of MSNs and FeO<sub>x</sub>-MSNs-*n*. (d) Structure parameters and Fe content of MSNs and FeO<sub>x</sub>-MSNs-*n*.

**Discussion:** The small-angle XRD patterns (Fig. S2a) show that all the samples remain well-defined mesostructure while the intensity of the diffraction peaks decreases as the content of FeO<sub>x</sub> species increases. It was speculated that the introduction of FeO<sub>x</sub> species in the pores led to partial collapse of the orderly mesopores and the reduction of Bragg diffraction intensity. The wide-angle XRD patterns (Fig. S2b) show no obvious diffraction peaks of iron oxides in all samples, indicating that the FeO<sub>x</sub> species in the nanocomposite are amorphous and no large iron oxides crystals are present on the surface of the FeO<sub>x</sub>-MSNs-*n*.

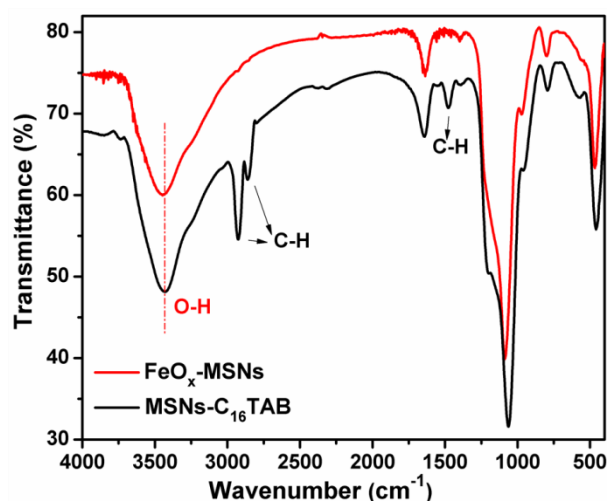

**Fig. S3** FTIR spectra of MSNs with surfactants (MSNs-C) and FeO<sub>x</sub>-MSNs. The C-H stretching vibrations at 2850-2900 cm<sup>-1</sup> and C-H bending/deformation vibrations at 1240-1500 cm<sup>-1</sup> are clearly observed in MSNs-C, but not in FeO<sub>x</sub>-MSNs, indicating the remove of surfactants in the FeO<sub>x</sub>-MSNs. The strong O-H vibration around 3400 cm<sup>-1</sup> in the FeO<sub>x</sub>-MSNs implies the high hydroxylation (-OH) level in the as-prepared FeO<sub>x</sub>-MSNs.

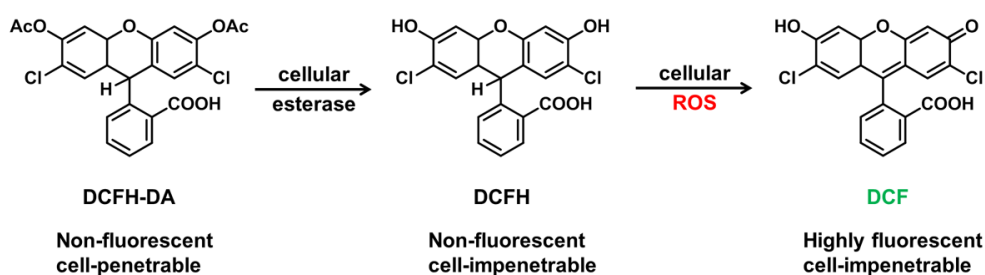

**Fig. S4** The reaction of non-fluorescent 2',7'-dichlorodihydrofluorescein diacetate (DCFH-DA) and ROS leads to fluorescent 2',7'-dichlorofluorescein (DCF). DCFH-DA is non-fluorescent but can penetrate into cells where it is converted into non-fluorescent dichlorofluorescein (DCFH) by cellular esterases, and is further oxidized to highly fluorescent, cell-impenetrable DCF by intracellular ROS. The DCF fluorescence intensity indicates the overall ROS levels in cells.

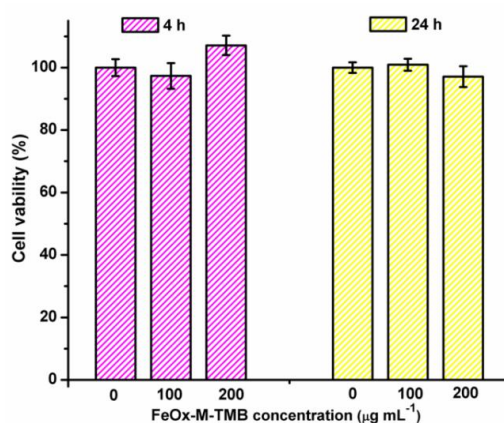

**Fig. S5** 4 h and 24 h *in vitro* cytotoxicity of FeO<sub>x</sub>-MSNs-TMB toward ZR75-30 cells.

## References

- 1 Q. J. He, J. L. Shi, F. Chen, M. Zhu and L. X. Zhang, *Biomaterials*, 2010, **31**, 3335-3346.
